# Supplementary material
Source: Springer Nature journal article supplement (https://www.springermedizin.de/resource/supplementary/12950_2012_264_MOESM13_ESM.pdf/9558308)

Supplementary Figure 2

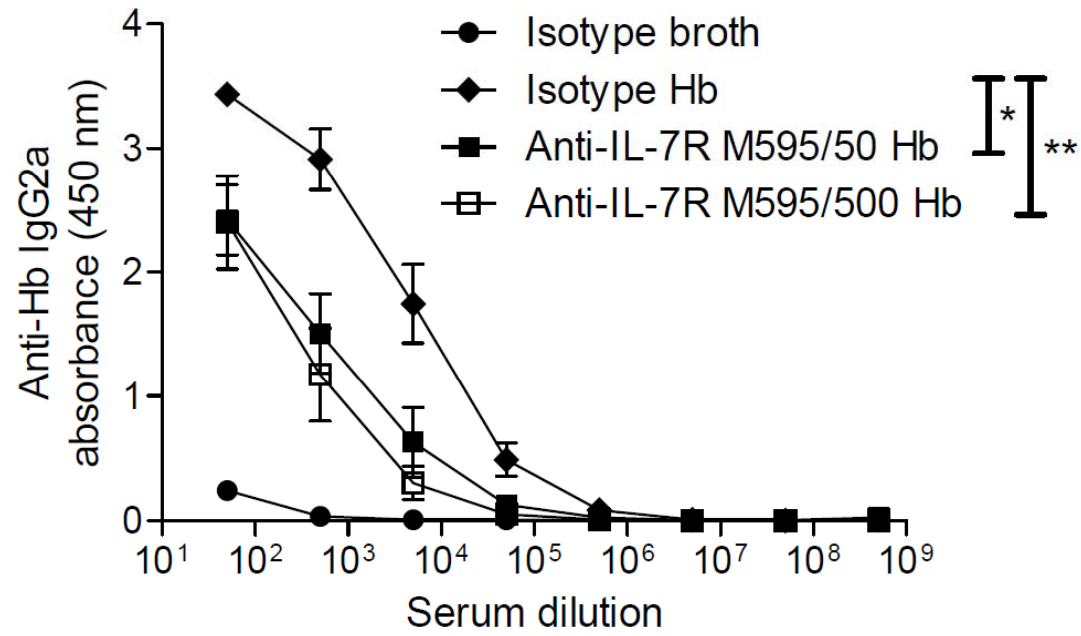

Supplement: MOESM13 [file 9558308]
